# Supplementary material for: In-syringe dispersive solid phase extraction: a novel format for electrospun fiber based microextraction
Source: Royal Society of Chemistry journal article supplement (doi:10.1039/c4an01464b), 2014-01-01
Supplement: c4an01464b1.pdf [file c4an01464b1.pdf]

# In-syringe dispersive solid phase extraction: a novel format for electrospun fiber based microextraction

Gang-Tian Zhu, Xiao-Mei He, Bao-Dong Cai, Han Wang, Jun Ding, Bi-Feng Yuan, and Yu-Qi Feng\*

Key Laboratory of Analytical Chemistry for Biology and Medicine (Ministry of Education),  
Department of Chemistry, Wuhan University, Wuhan 430072, P.R. China

\* Corresponding author: Yu-Qi Feng, Department of Chemistry, Wuhan University, Wuhan 430072, P.R. China. Tel: +86-27-68755595; Fax: +86-27-68755595; E-mail: [yqfeng@whu.edu.cn](mailto:yqfeng@whu.edu.cn)

**Table S1.** The recoveries (% , RSD) of cytokinins by in-syringe dSPE.

|                     | Recoveries (% , RSD) |         |         |          |          |          |          |          |
|---------------------|----------------------|---------|---------|----------|----------|----------|----------|----------|
|                     | tZ9G                 | tZ      | tZR     | DHZ      | DHZR     | iP9G     | iP       | iPR      |
| Standard cytokinins | 76 (5%)              | 75 (6%) | 59 (9%) | 60 (3%)  | 89 (17%) | 56 (14%) | 64 (8%)  | 55 (10%) |
| Plant sample        | 48 (5%)              | 32 (6%) | 58 (1%) | 31 (19%) | 53 (11%) | 29 (13%) | 12 (14%) | 30 (15%) |

**Table S2.** Calibration curves, LODs and LOQs of cytokinins.

| Analytes | Linear dynamic range<br>(ng mL <sup>-1</sup> ) | Regression line |           |                             | LODs<br>(pg mL <sup>-1</sup> ) | LOQs<br>(pg mL <sup>-1</sup> ) |
|----------|------------------------------------------------|-----------------|-----------|-----------------------------|--------------------------------|--------------------------------|
|          |                                                | Slope           | Intercept | <i>R</i> <sup>2</sup> value |                                |                                |
| tZ9G     | 0.003-20                                       | 18.783          | 1.870     | 0.9987                      | 0.6                            | 2.1                            |
| tZ       | 0.01-20                                        | 7.824           | 0.814     | 0.9982                      | 4.5                            | 15.0                           |
| tZR      | 0.005-20                                       | 4.564           | 0.262     | 0.9989                      | 1.6                            | 5.2                            |
| DHZ      | 0.03-20                                        | 2.596           | 0.384     | 0.9955                      | 7.5                            | 24.9                           |
| DHZR     | 0.003-20                                       | 7.198           | 0.940     | 0.9954                      | 0.7                            | 2.2                            |
| iP9G     | 0.003-20                                       | 10.865          | -0.551    | 0.9991                      | 0.8                            | 2.6                            |
| iP       | 0.03-20                                        | 1.604           | 0.134     | 0.9990                      | 9.0                            | 29.9                           |
| iPR      | 0.001-20                                       | 8.319           | 0.944     | 0.9984                      | 0.3                            | 0.8                            |

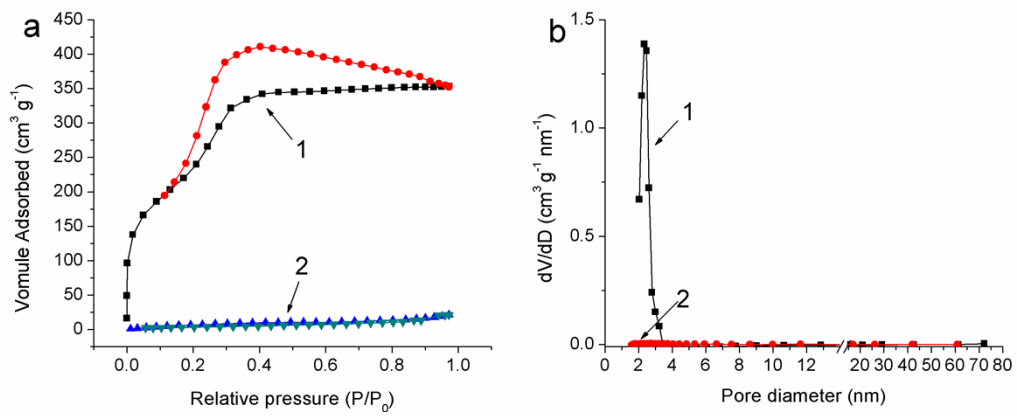

**Figure S1.** N<sub>2</sub> adsorption–desorption isotherms of MSF (a1) and ASF (a2), and pore size distributions of MSF (b1) and ASF (b2).
